# Supplementary material for: An inexpensive and sensitive turn-on luminescence protocol for sensing formaldehyde
Source: Royal Society of Chemistry journal article supplement (doi:10.1039/d0cc04183a), 2020-01-01
Supplement: d0cc04183a1.pdf [file d0cc04183a1.pdf]

## An inexpensive and sensitive turn-on luminescence protocol for sensing formaldehyde

Dipankar Bhowmik, Arnab Dutta and Uday Maitra\*

Indian Institute of Science, Bangalore, Karnataka 560012, India.

### 1. Materials and methods

Sodium cholate, terbium nitrate pentahydrate, biphenyl-4-carboxaldehyde (**1**), allyl pinacol boronate were purchased from Sigma-Aldrich. Western blotting paper (thickness: 0.83 mm) was locally purchased. MiliQ water (18.2 M $\Omega$ .cm at 25 °C) was used for all the experiments. An ultrasonic bath (frequency: 33 kHz) was used for the gel preparation. NMR spectra were recorded in Bruker 400 MHz spectrometer. Chemical shifts are reported in  $\delta$  (ppm) relative to tetramethylsilane ( $\delta$  0, s). Multiplicities are reported as follows: s (singlet), d (doublet), t (triplet), dd (doublet of doublets), tdd (triplet of doublets of doublets), m (multiplet). Coupling constants are reported in Hertz (Hz) and the number of protons associated with a given resonance is indicated as nH. High resolution mass spectra (HRMS) were recorded in Xevo G2-XS QToF instrument. Absorption spectra were recorded on UV-3600 Shimadzu UV-Vis-NIR spectrometer. Time delayed emission from gel samples were recorded on Varian Cary Eclipse spectrometer in phosphorescence mode (delay time: 0.2 ms, gate time: 3.0 ms). A Varioskan<sup>®</sup> Flash Spectral Scanning Multimode Reader was used for the luminescence measurement of gel coated paper discs in TRF mode with delay time of 200  $\mu$ s, integration time of 1000  $\mu$ s,  $\lambda_{\text{ex}}$  = 300 nm, and  $\lambda_{\text{em}}$  = 545 nm. The error bars reflect the standard deviations of four set of measurements. HPLC analysis was performed on a Shimadzu HPLC system equipped with LC-10ATvp gradient pump and SPD-M10Avp UV-Vis detector. A reversed-phase C18 column (Phenomenex, 5  $\mu$ m, 250 x 4.60 mm) was used for analysis. AFM images were recorded using JPK Nano Wizard II instrument.

## 2. Synthesis of *pro*-sensitizers:

*Pro*-sensitizers were synthesised following Scheme S1.

### Scheme S1: Synthetic route of *pro*-sensitizers

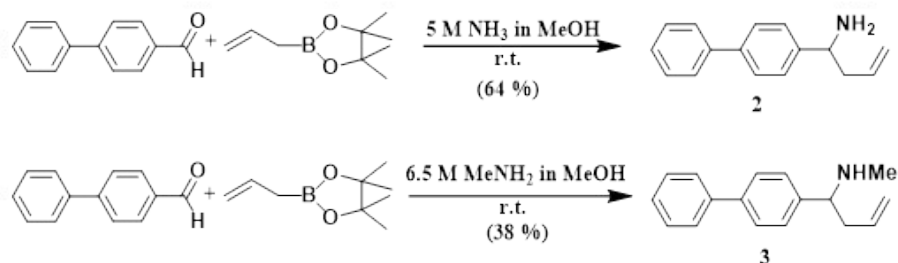

### 2.1. Synthesis of 2:

In an oven dried vial (8 mL), equipped with a magnetic stir bar containing biphenyl-4-carboxaldehyde (25 mg, 0.14 mmol, 1 eq), NH<sub>3</sub> in MeOH (0.45 mL of 5 M, 2.25 mmol, 16 eq) was added and stirred at room temperature for 0.5 h. Allyl pinacol boronate (30  $\mu$ L, 0.16 mmol, 1.14 eq) was added and the reaction was allowed to continue at room temperature under constant stirring for 16 h. The reaction mixture was diluted with MeOH (3 mL), transferred to a round bottomed flask and concentrated to obtain oily white mass. Oily white mass was dissolved in 5 mL of ethyl acetate, washed with saturated NaHCO<sub>3</sub> solution (2x10 mL). The washings were combined and extracted with ethyl acetate (3x5 mL). The combined organic layer was dried over anhydrous Na<sub>2</sub>SO<sub>4</sub>, concentrated to obtain crude product. The crude product was purified by column chromatography on silica gel using MeOH-CHCl<sub>3</sub> (0.5-3 %) to get compound 2 (20 mg, 64 %) as a liquid.

**<sup>1</sup>H NMR (400 MHz, CDCl<sub>3</sub>)  $\delta$  ppm:** 7.60-7.56 (m, 4H), 7.45-7.41 (m, 4H), 7.35 – 7.32 (m, 1H), 5.79-5.73 (m, 1H), 5.17-5.09 (m, 2H), 4.07-4.04 (dd,  $j = 7.6$  Hz,  $j = 8$  Hz, 1H), 2.56-2.49 (m, 1H), 2.45-2.38 (m, 1H). (Figure S1)

**<sup>13</sup>C NMR (100 MHz, CDCl<sub>3</sub>)  $\delta$  ppm:** 144.39, 140.92, 140.07, 135.23, 128.79, 127.23, 127.09, 126.86, 117.96, 55.15, 43.91. (Figure S2)

**HRMS:** Calculated for C<sub>16</sub>H<sub>18</sub>N [M+H] 224.1439, Observed C<sub>16</sub>H<sub>18</sub>N [M+H] 224.1437.

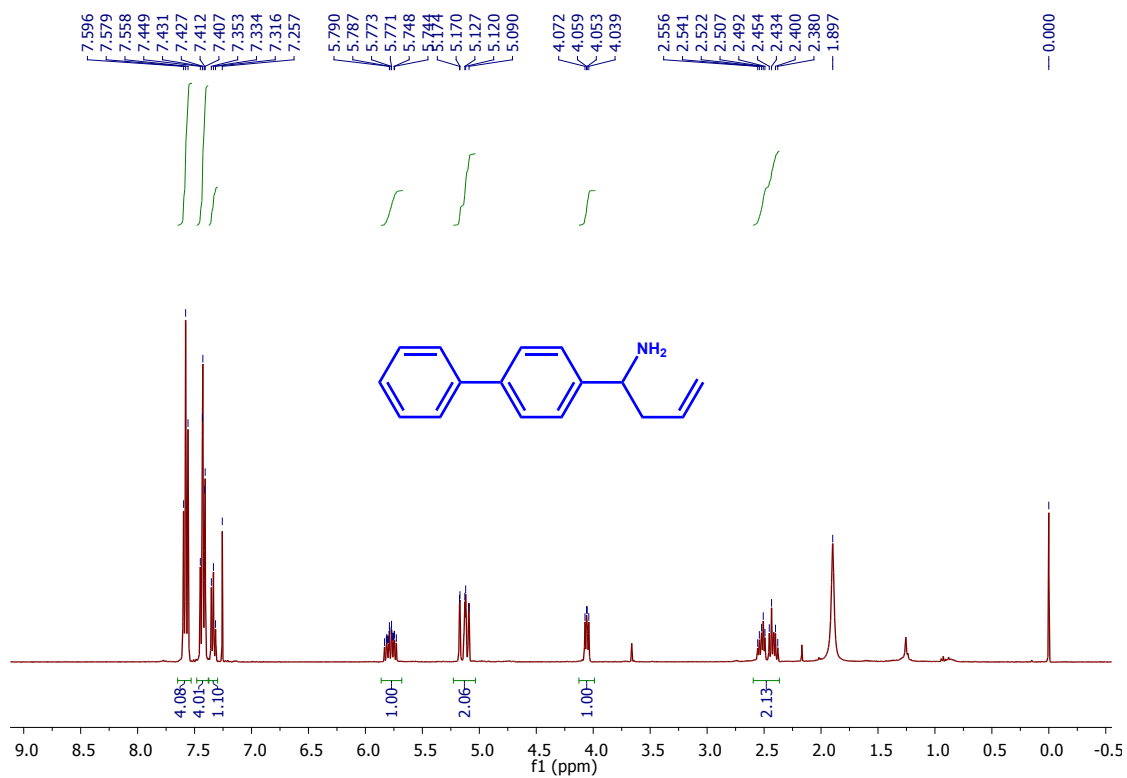

**Figure S1:** <sup>1</sup>H NMR spectrum of **2** (CDCl<sub>3</sub>, 400 MHz).

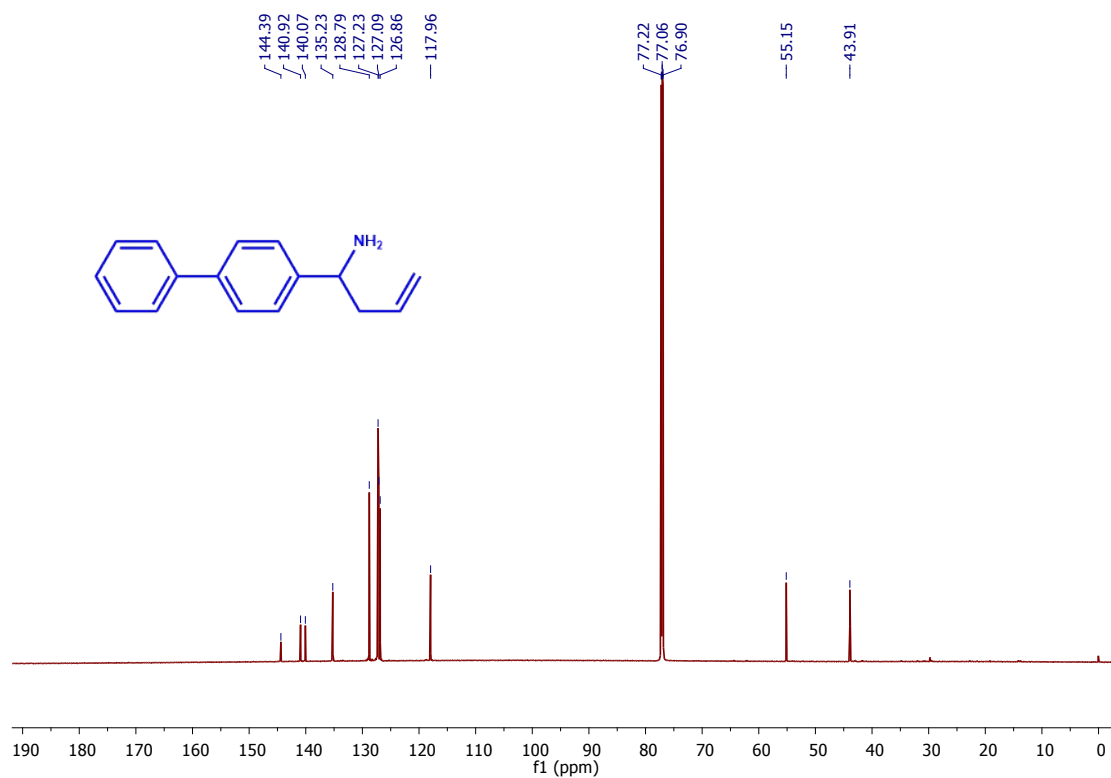

**Figure S2:** <sup>13</sup>C NMR spectrum of **2** (CDCl<sub>3</sub>, 100 MHz).

## 2.2. Synthesis of 3:

Biphenyl-4-carboxaldehyde (26 mg, 0.14 mmol, 1 eq) was taken in an oven dried vial (8 mL) equipped with a magnetic stir bar. To it MeNH<sub>2</sub> in MeOH (0.45 mL of 6.5 M, 2.9 mmol, 21 eq) was added and stirred at room temperature for 1 h. Allyl pinacol boronate (28  $\mu$ L, 0.15 mmol, 1.07 eq) was added and the reaction was allowed to continue at room temperature for 16 h under constant stirring. The reaction mixture was diluted with MeOH (5 mL), transferred to a round bottomed flask and concentrated to obtained oily yellowish mass. Oily yellowish mass was dissolved in chloroform (5 mL), washed with saturated NaHCO<sub>3</sub> solution (2x10 mL). The washings were combined and extracted with chloroform (3x5 mL). The combined chloroform layer was dried over anhydrous Na<sub>2</sub>SO<sub>4</sub>, concentrated under reduced pressure to obtain crude product. The crude product was purified by column chromatography on silica gel using MeOH-CHCl<sub>3</sub> (0.5-3 %) to obtain compound **3** (12.7 mg 38 %) as a liquid.

**<sup>1</sup>H NMR (400 MHz, CDCl<sub>3</sub>)  $\delta$  ppm:** 7.61-7.57 (m, 4H), 7.46-7.32 (m, 5H), 5.80-5.69 (tdd,  $j$  = 7.2 Hz,  $j$  = 10 Hz,  $j$  = 17.2 Hz, 1H), 5.154-5.06 (m, 2H), 3.64-3.61 (t,  $j$  = 6.8 Hz, 1H), 2.53-2.50 (dd,  $j$  = 6.8 Hz,  $j$  = 7.2 Hz, 2H), 2.33 (s, 3H). (Figure S3)

**<sup>13</sup>C NMR (100 MHz, CDCl<sub>3</sub>)  $\delta$  ppm:** 141.96, 141.10, 140.34, 135.29, 135.27, 128.95, 127.94, 127.38, 127.25, 118.06, 64.49, 42.61, 34.47. (Figure S4)

**HRMS:** Calculated for C<sub>17</sub>H<sub>19</sub>NH [M+H] 238.1596, Observed C<sub>17</sub>H<sub>19</sub>NH [M+H] 238.1594.

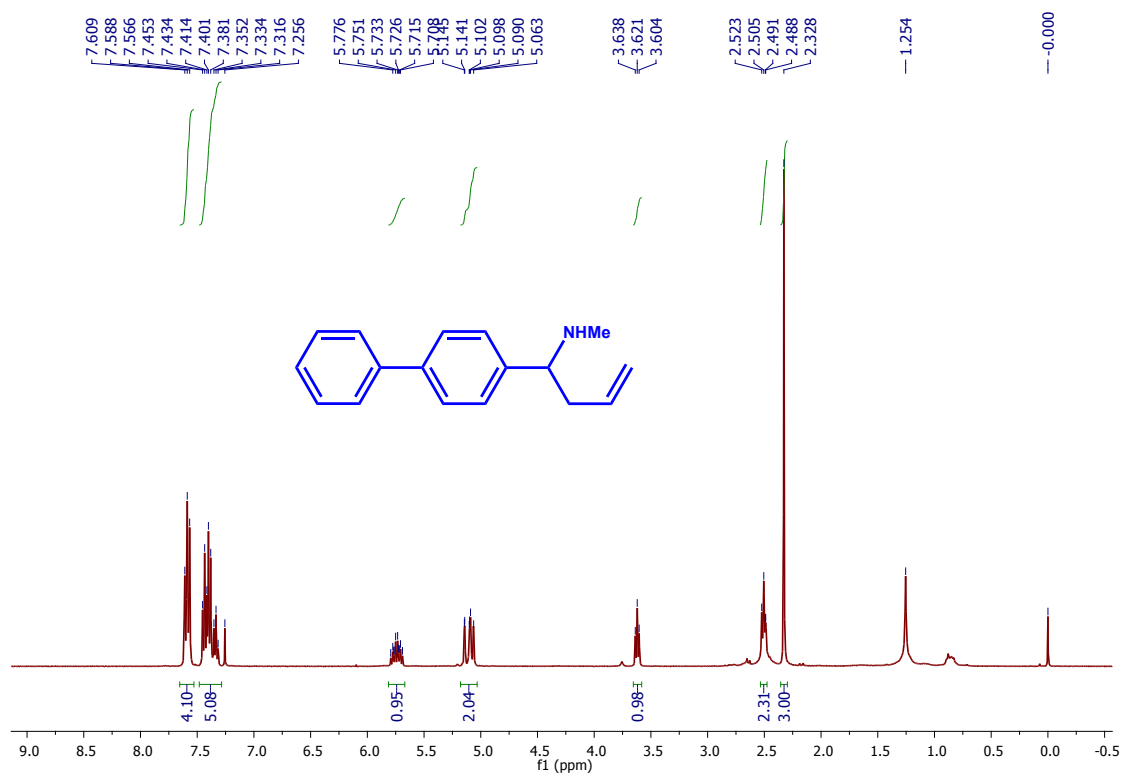

**Figure S3:** <sup>1</sup>H NMR spectrum of **3** (CDCl<sub>3</sub>, 400 MHz).

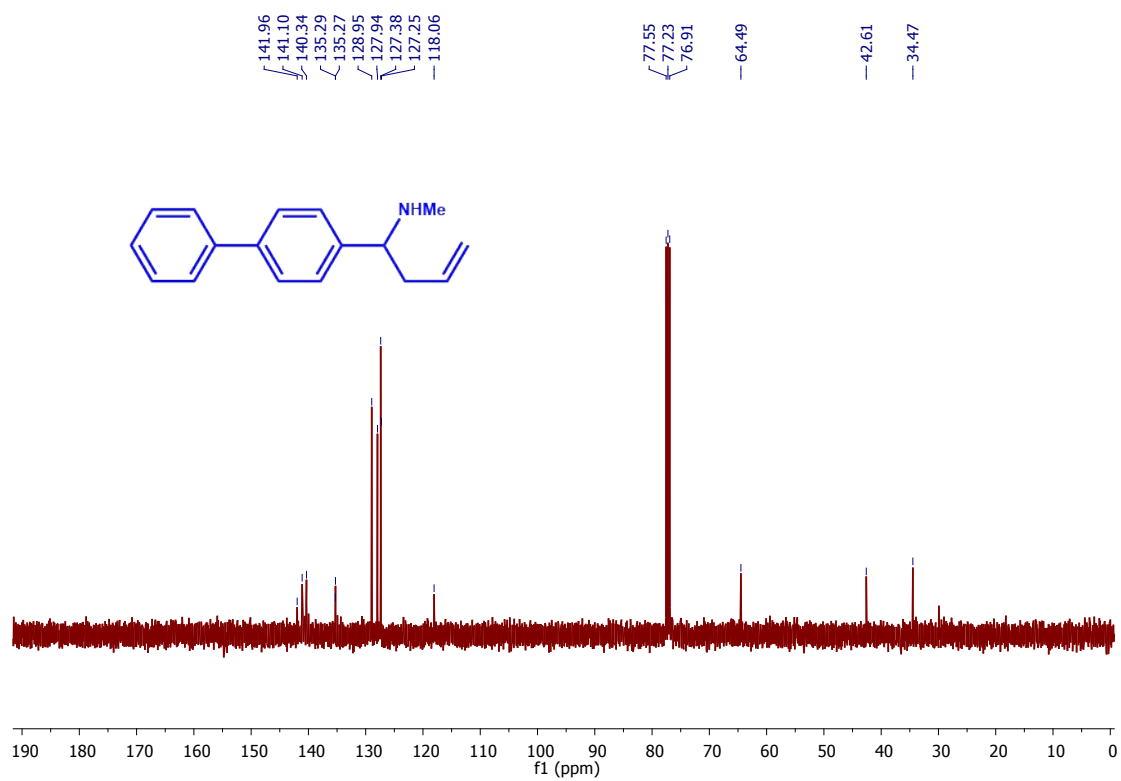

**Figure S4:** <sup>13</sup>C NMR spectrum of **3** (CDCl<sub>3</sub>, 100 MHz).

### 3. Absorption spectra of 1, 2 and 3, and emission spectrum of 1:

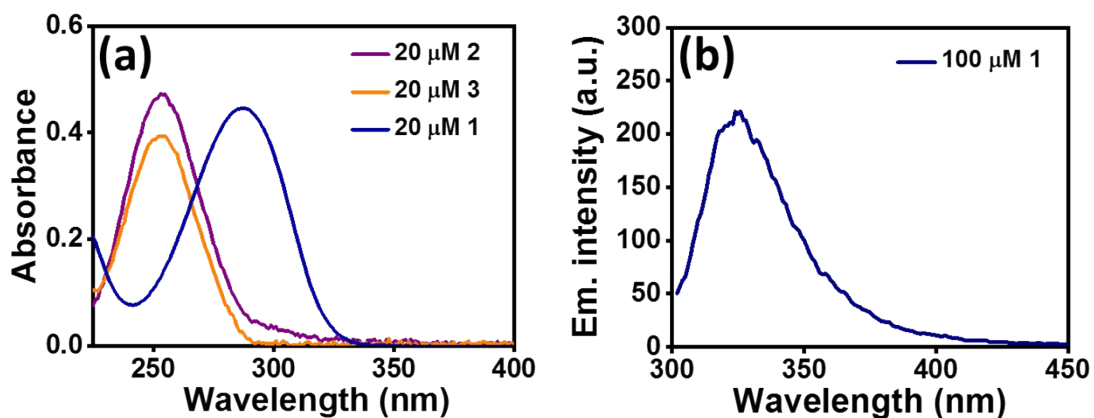

**Figure S5:** (a) Absorption spectra of 1, 2 and 3 in methanol. (b) Emission spectrum of 1 in MeOH,

$\lambda_{\text{ex}} = 288 \text{ nm}$ .

### 4. Extent of $\text{Tb}^{3+}$ luminescence sensitization by 1, 2 and 3:

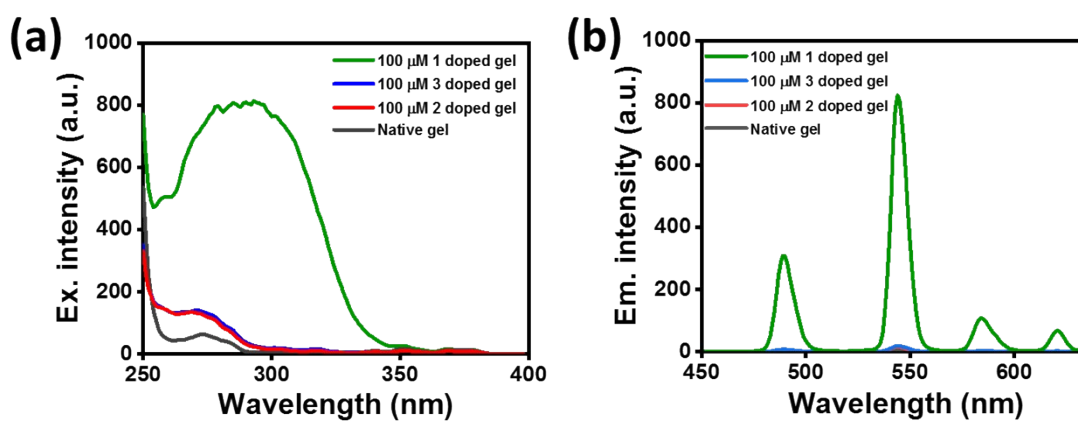

**Figure S6:** Time-delayed (a) excitation spectra ( $\lambda_{\text{em}} = 545 \text{ nm}$ ) and (b) emission spectra ( $\lambda_{\text{ex}} = 300 \text{ nm}$ ),

of sensitizer and *pro*-sensitizer doped TbCh gels.

## 5. HPLC chromatogram:

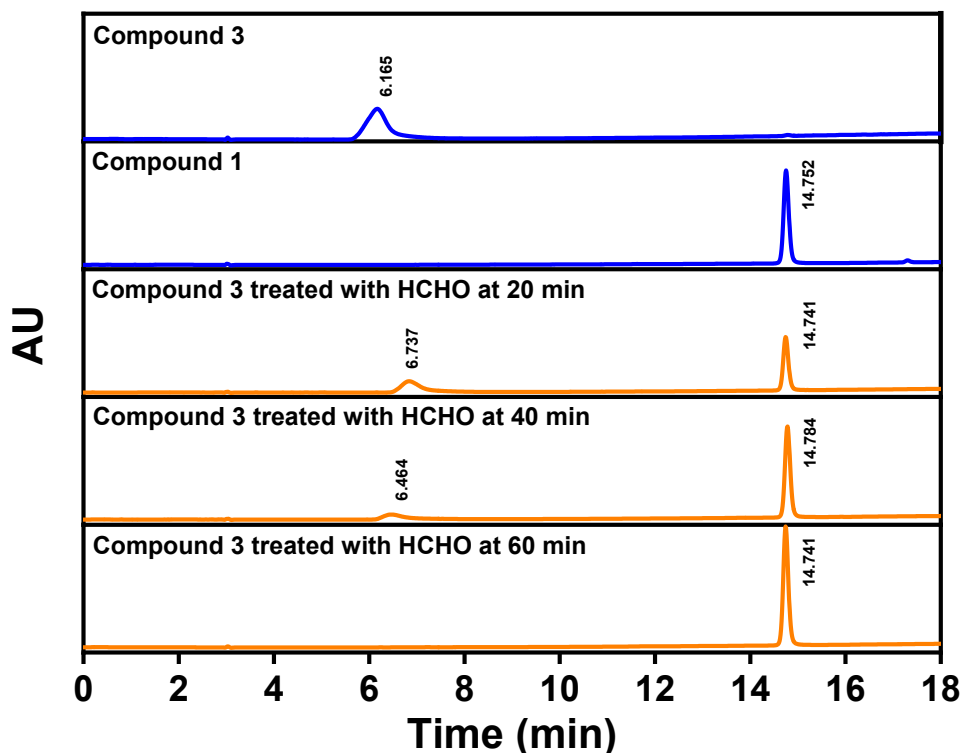

**Figure S7:** HPLC chromatogram (monitored at 270 nm) of formaldehyde (0.3 mM) treated solution of compound 3 (0.1 mM) heated at 100 °C (mobile phase: 50 % MeOH/H<sub>2</sub>O to 90 % MeOH/H<sub>2</sub>O).

## 6. Limit of detection (LOD) determination:

A calibration curve was constructed from the plot of time delayed emission ( $\lambda_{em} = 545$  nm,  $\lambda_{ex} = 300$  nm) intensity, from gel coated paper discs, versus concentration of FA (Figure S8). The LOD was calculated using the following equation,

$$LOD = 3 * S.D. / m$$

Where S.D. is the standard deviation for the time delayed fluorescent intensity of gel coated paper discs without FA, and m is the slope of the curve. The equation of linear fit is,

$$y = 4677.19x + 34097.63 \quad (R^2 = 0.9959)$$

So,

$$LOD = 3 * 153 / 4677.19 = 98 \text{ nM}$$

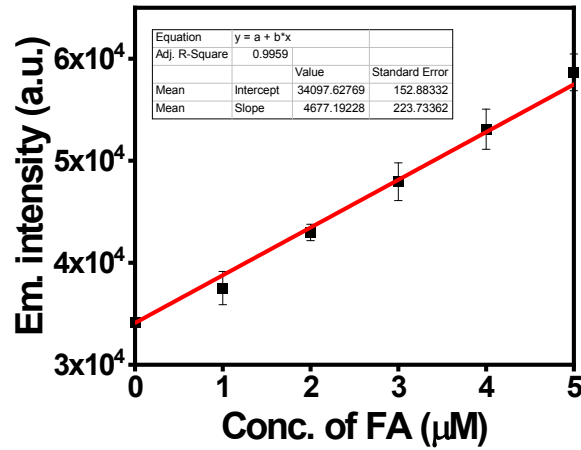

Figure S8: LOD determination plot.

## 7. Design and dimension of paper strip:

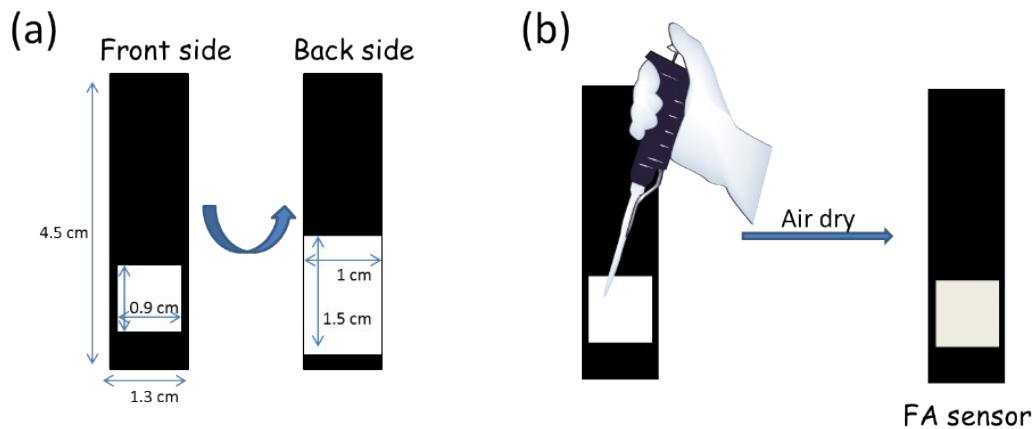

Figure S9: (a) Design and dimension of the paper strip. (b) Fabrication of the paper strip.

## 8. Calculation of vapour concentration:

Calculation is based on the assumption that FA present in solution vaporizes completely into gaseous state during incubation.

$$\text{Vapour conc.} = \frac{30.03 * x * y}{1000 * v} \text{ mg/m}^3 = \left( \frac{30.03 * x * y}{1000 * v} \right) * 0.814 \text{ ppm}$$

(At 25 °C, 1 mg/m<sup>3</sup> = 0.814 ppm)



Where  $x$  and  $y$  denote the volume (in mL) and concentration (in mM) of incubated FA solution, respectively;  $v$  ( $3.5 \times 10^{-6} \text{ m}^3$ ) is the volume of cuvette containing the paper strip.
